# Supplementary material
Source: publisher site journal article supplement (https://www.dovepress.com/get_supplementary_file.php?f=385510.docx)
Supplement: Supplementary file 1 [file get_supplementary_file.php]

**Supplementary material**

**Table S1** The PSQ-C-13 distribution of scores for scales and items.

| **Variables** | **Baseline** | | | | **Follow-up** | | | |
| --- | --- | --- | --- | --- | --- | --- | --- | --- |
| **Mean** | **SD** | **Skew** | **Kurt** | **Mean** | **SD** | **Skew** | **Kurt** |
| Total | 29.019 | 6.377 | 0.422 | 0.295 | 28.375 | 6.336 | 0.303 | 0.156 |
| Constraint | 19.754 | 4.321 | 0.369 | 0.131 | 19.110 | 4.360 | 0.274 | 0.097 |
| Imbalance | 9.265 | 2.584 | 0.594 | 0.388 | 9.265 | 2.471 | 0.486 | 0.297 |
| Item 03 | 1.971 | 0.722 | 0.404 | -0.033 | 1.958 | 0.675 | 0.302 | -0.007 |
| Item 04 | 2.861 | 0.804 | -0.194 | -0.609 | 2.676 | 0.764 | 0.050 | -0.520 |
| Item 05 | 1.540 | 0.610 | 0.828 | 0.539 | 1.534 | 0.621 | 0.965 | 1.035 |
| Item 06 | 1.871 | 0.799 | 0.653 | -0.087 | 1.951 | 0.778 | 0.455 | -0.299 |
| Item 08 | 2.469 | 0.727 | 0.485 | -0.220 | 2.411 | 0.731 | 0.532 | -0.068 |
| Item 09 | 2.443 | 0.838 | 0.145 | -0.564 | 2.317 | 0.787 | 0.136 | -0.426 |
| Item 12 | 1.987 | 0.716 | 0.548 | 0.459 | 1.935 | 0.651 | 0.345 | 0.313 |
| Item 14 | 2.188 | 0.647 | 0.587 | 0.818 | 2.191 | 0.649 | 0.433 | 0.508 |
| Item 18 | 2.460 | 0.807 | 0.094 | -0.487 | 2.327 | 0.760 | 0.263 | -0.221 |
| Item 19 | 2.194 | 0.838 | 0.284 | -0.518 | 2.210 | 0.780 | 0.395 | -0.114 |
| Item 20 | 1.896 | 0.731 | 0.608 | 0.349 | 1.887 | 0.677 | 0.578 | 0.753 |
| Item 23 | 2.518 | 0.881 | 0.244 | -0.745 | 2.469 | 0.792 | 0.336 | -0.406 |
| Item 30 | 2.621 | 0.843 | 0.055 | -0.689 | 2.508 | 0.878 | 0.090 | -0.716 |

**Abbreviations:** PSQ-C-13, Chinese Perceived Stress Questionnaire-13; SD, standard deviation; Skew, skewness; Kurt, kurtosis.
